# Supplementary material for: Role of microRNAs in epigenetic silencing of the CHD5 tumor suppressor gene in neuroblastomas
Source: PubMed Central journal article supplement (PMC4941291; doi:10.18632/oncotarget.7434), 2016-02-16
Supplement: oncotarget-07-15977-s002.pdf [file oncotarget-07-15977-s002.pdf]

**Supplementary Table S1.** List of identified microRNAs along with their chromosomal location and nucleotide sequence.

| <b>microRNA*</b> | <b>Chromosome</b> | <b>Nucleotide sequence 5'- 3'</b> |
|------------------|-------------------|-----------------------------------|
| hsamiR-204       | 9q21.12           | UUCCCUUUGUCAUCCUAUGCCU            |
| hsa-miR-211      | 15q13.3           | UUCCCUUUGUCAUCCUUCGCCU            |
| hsa-miR-216b     | 2p16.1            | AAAUCUCUGCAGGCAAUGUGA             |
| hsa-miR-3666     | 7q31.1            | CAGUGCAAGUGUAGAUGCCGA             |
| hsa-miR-17       | 13q31.3           | CAAAGUGCUUACAGUGCAGGUAG           |
| hsa-miR-19a      | 13q.31.3          | AGUUUUGCAUAGUUGCACUACA            |
| hsa-miR-19b      | 13q.31.3          | UGUGCAAUCCAUGCAAACUGA             |
| hsa-miR-20a      | 13q.31.3          | UAAAGUGCUUAUAGUGCAGGUAG           |
| hsa-miR-20b      | Xq26.2            | CAAAGUGCUCAUAGUGCAGGUAG           |
| hsa-miR-93       | 7q.22.1           | CAAAGUGCUGUUCGUGCAGGUAG           |
| hsa-miR-106a     | Xq26.2            | AAAAGUGCUUACAGUGCAGGUAG           |
| hsa-miR-106b     | 7q22.1            | UAAAGUGCUGACAGUGCAGAU             |
| hsa-miR-130a     | 11q.12.1          | UUCACAUUGUGCUACUGUCUGC            |
| hsa-miR-130b     | 22q11.21          | ACUCUUUCCCUGUUGCACUAC             |
| hsa-miR-301a     | 17q.22            | GCUCUGACUUUAUUGCACUACU            |
| hsa-miR-301b     | 22q11.21          | CAGUGCAAUGAUUUGUCAAGC             |
| hsa-miR-454      | 17q.22            | ACCCUAUCAUAUUGUCUCUGC             |
| hsa-miR-519d     | 1pq.13.42         | CAAAGUGCCUCCCUUAGAGUG             |

\* Computational analysis using bioinformatic tools such as miRanda ([www.microrna.org](http://www.microrna.org)), TargetScan ([www.targetscan.org](http://www.targetscan.org)), miRDB ([mirdb.org](http://mirdb.org)), and DIANA 3.0 ([diana.cslab.ece.ntua.gr/microT](http://diana.cslab.ece.ntua.gr/microT)) were used to predict miRNAs that target 3' UTR of CHD5.
